# Supplementary material for: An efficient CRISPR vector toolbox for engineering large deletions in Arabidopsis thaliana
Source: PubMed Central journal article supplement (PMC6071326; doi:10.1186/s13007-018-0330-7), 2018-08-02

**a**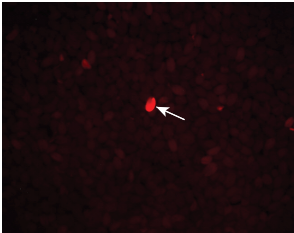**b**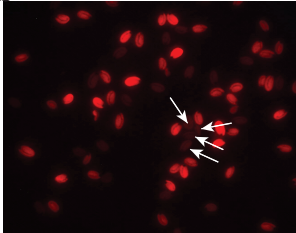

Supplement: 13007_2018_330_MOESM1_ESM.pdf [file 13007_2018_330_MOESM1_ESM.pdf]
