# Supplementary material for: An efficient CRISPR vector toolbox for engineering large deletions in Arabidopsis thaliana
Source: Plant Methods. 2018 Aug 2;14:65. doi: 10.1186/s13007-018-0330-7 (PMC6071326; doi:10.1186/s13007-018-0330-7)
Supplement: Supplementary file 5 — Additional file 5: Table S3. Overview of vectors. [file 13007_2018_330_MOESM5_ESM.xlsx]

## Sheet: Sheet1
	Additional file 5: Table S3. Overview of vectors.
	Vector	Origin	Addgene
	pZ001	Lampropoulos et al., 2013
	pD000	Lampropoulos et al., 2013
	pE000	Lampropoulos et al., 2013
	pRW003	Gao et al., 2016
	pRW004	SM destination vector with proUBQ10	104438
	pRW006	SM destination vector with pro35S	104439
	pEF004	sgRNA shuffle-in vector for target 1	104440
	pEF005	sgRNA shuffle-in vector for target 2	104441
